# Supplementary material for: Flexible fluorinated multi-walled carbon nanotube/polyarylene ether nitrile metacomposites with negative permittivity
Source: Royal Society of Chemistry journal article supplement (doi:10.1039/d1tc03831a), 2021-11-19
Supplement: d1tc03831a1.pdf [file d1tc03831a1.pdf]

## Supplementary Information

### **Flexible fluorinated multi-walled carbon nanotube/polyarylene ether nitrile metacomposites with negative permittivity**

Weihua Han<sup>1,2</sup>, Feng Gao<sup>1</sup>, Lingyun Zhou<sup>1</sup>, Lu Wang<sup>3</sup>, Xiufu Hua<sup>4\*</sup>, Xinyu Xue<sup>1</sup>, Zhiqiang Li<sup>1</sup>, Wei Luo<sup>1</sup>, Lingyun Pang<sup>1</sup>, and Renbo Wei<sup>1\*</sup>

*1 School of Chemical Engineering, Northwest University, Xi'an 710069, China.*

*2 High-tech Institute, QingZhou 262550, China*

*3 Sichuan Institute of Piezoelectric and Acoustooptic Technology, Chongqing 400060, China*

*4 Yangtze Delta Region Institute of Tsinghua University, Jiaxing 314006, China.*

Corresponding author. E-mail address: weirb10@nwu.edu.cn

Corresponding author. E-mail address: hua\_xiufu@163.com

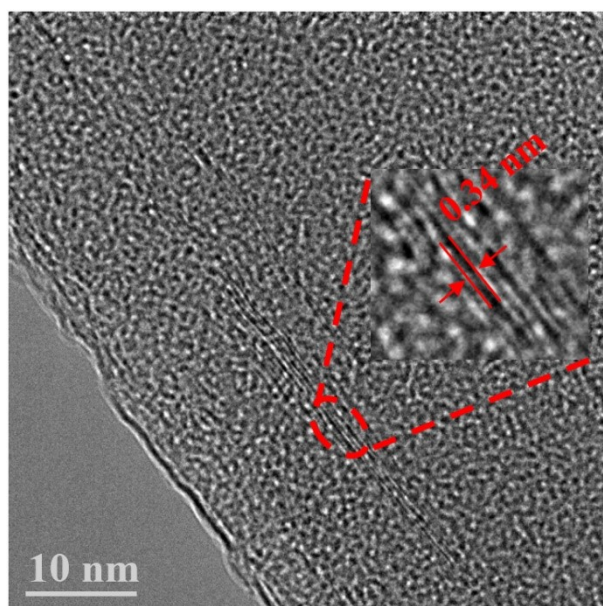

Figure S1 HRTEM micrograph of FMWCNT.

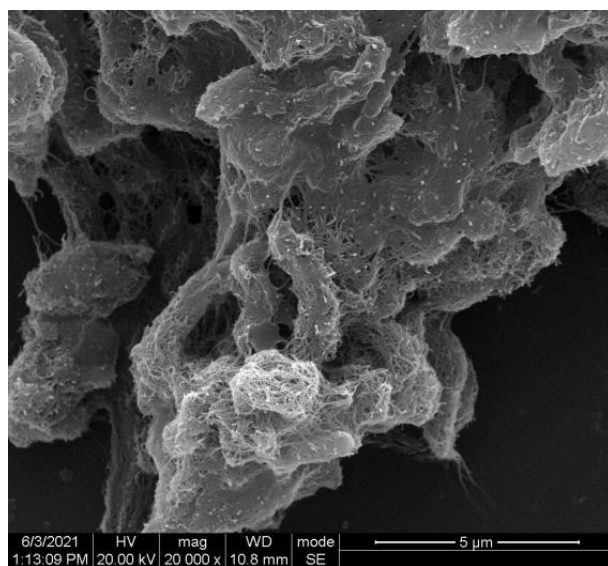

Figure S2 SEM micrograph of MWCNT.

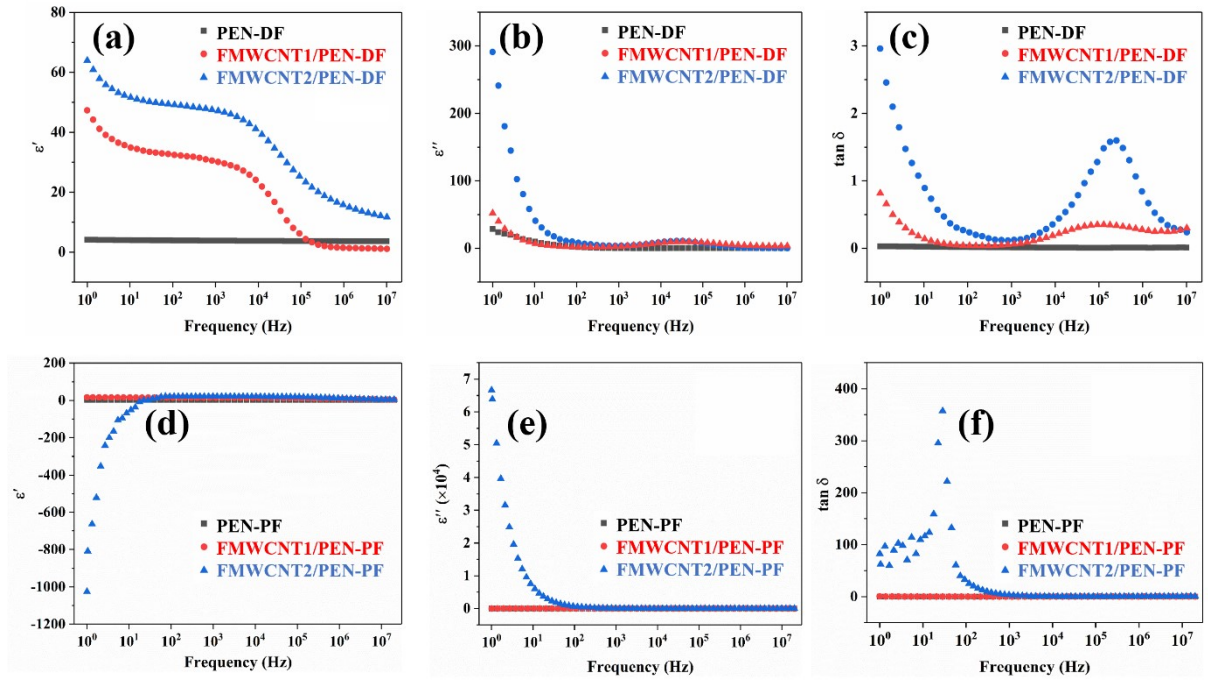

Figure S3 Real permittivity (a), imaginary permittivity (b) and  $\tan \delta$  (c) of FMWCNT/PEN-DF composites; real permittivity (d), imaginary permittivity (e) and  $\tan \delta$  (f) of FMWCNT/PEN-PF composites.

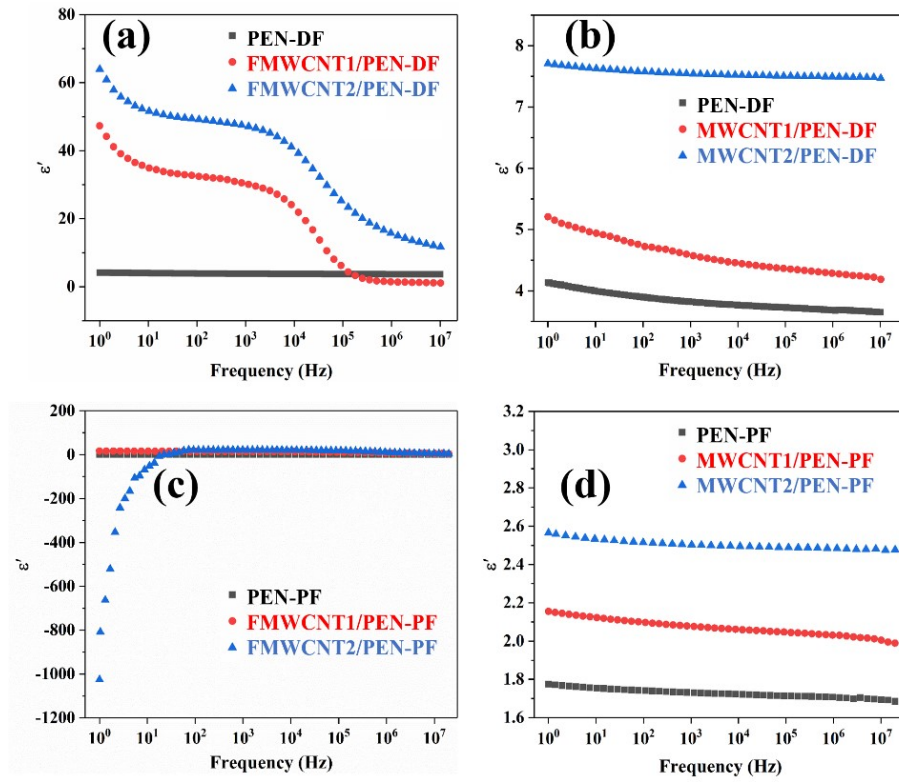

Figure S4 Real permittivity of FMWCNT/PEN-DF (a), MWCNT/PEN-DF (b), FMWCNT/PEN-PF (c) and MWCNT/PEN-PF (d).

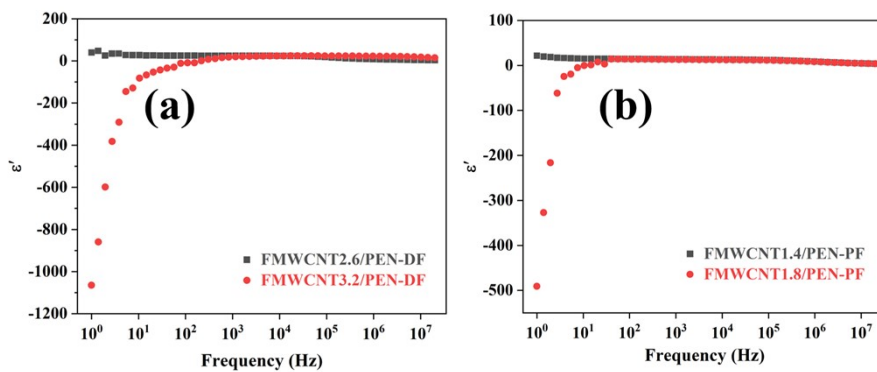

Figure S5 Permittivity of FMWCNT2.6/PEN-DF and FMWCNT3.2/PEN-DF (a), permittivity of

FMWCNT1.4/PEN-PF and FMWCNT1.8/PEN-PF (b).

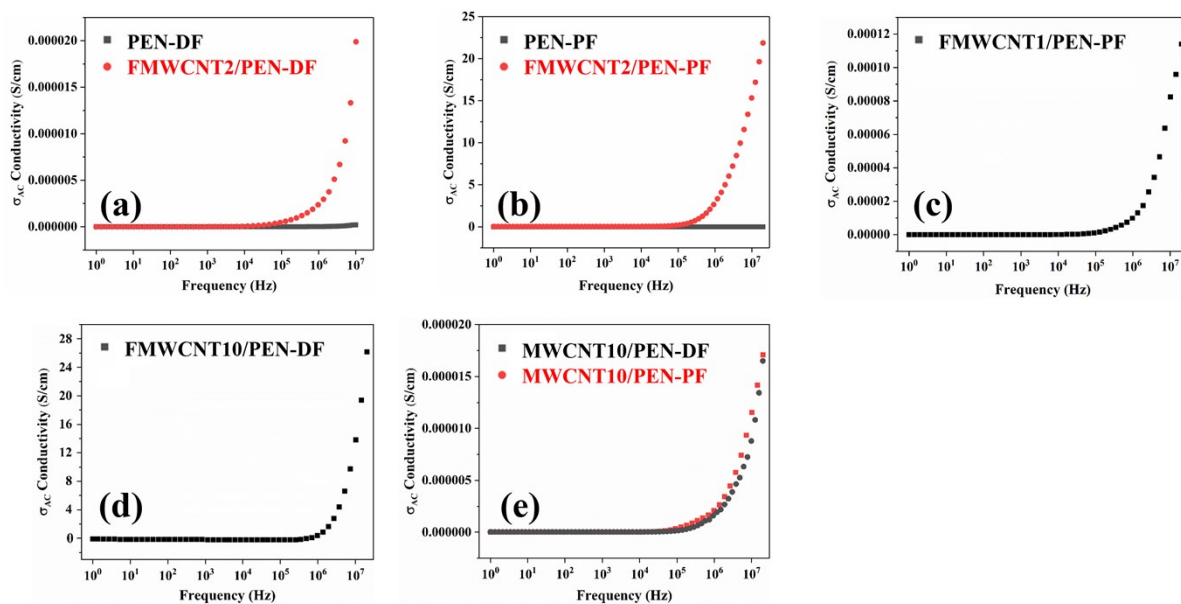

Figure S6 (a) AC conductivity of PEN-DF and FMWCNT2/PEN-DF; (b) AC conductivity of PEN-PF and FMWCNT2/PEN-PF; (c) AC conductivity of FMWCNT1/PEN-PF; (d) AC conductivity of FMWCNT10/PEN-DF; (e) AC conductivity of MWCNT10/PEN-DF and MWCNT10/PEN-PF.

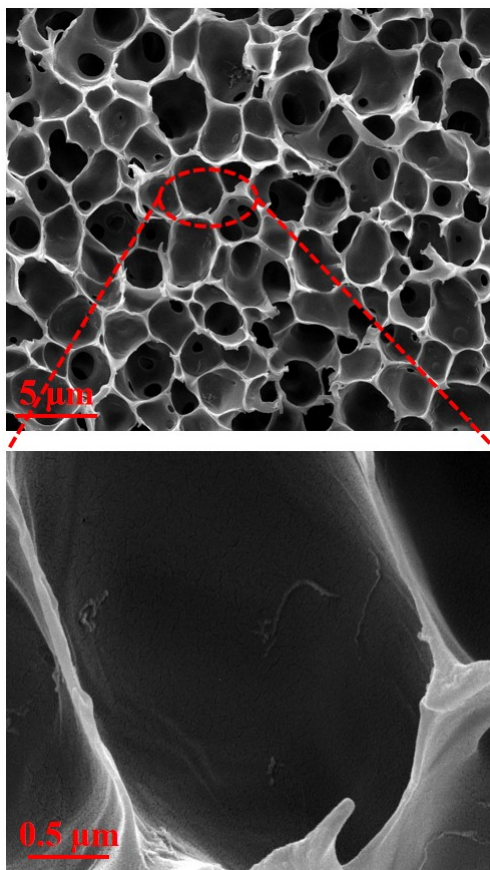

Figure S7 SEM micrograph of FWCNT1/PEN-PF.



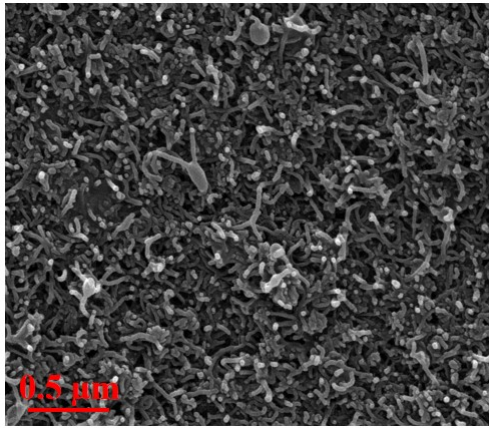

Figure S8 SEM micrograph of FMWCNT10/PEN-DF.

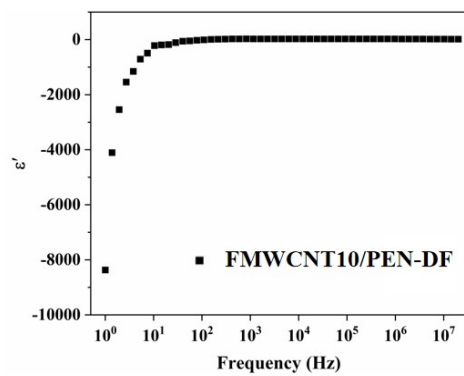

Figure S9 Permittivity of FMWCNT10/PEN-DF.

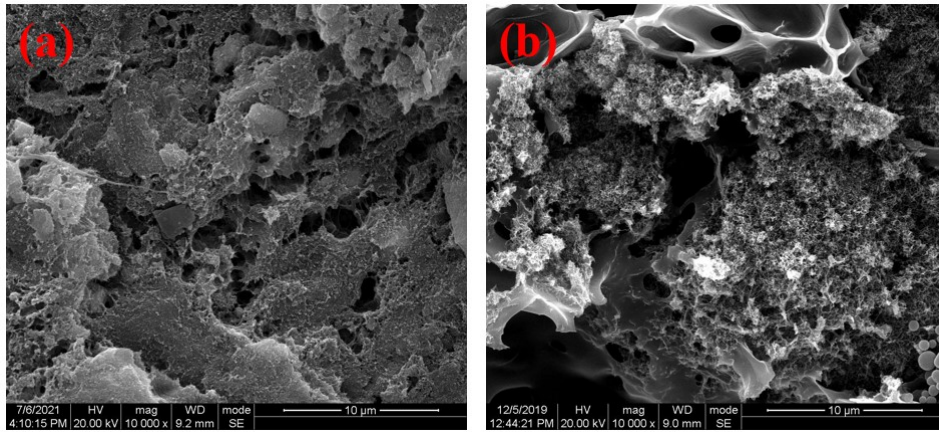

Figure S10 SEM micrographs of MWCNT10/PEN-DF and MWCNT10/PEN-PF.

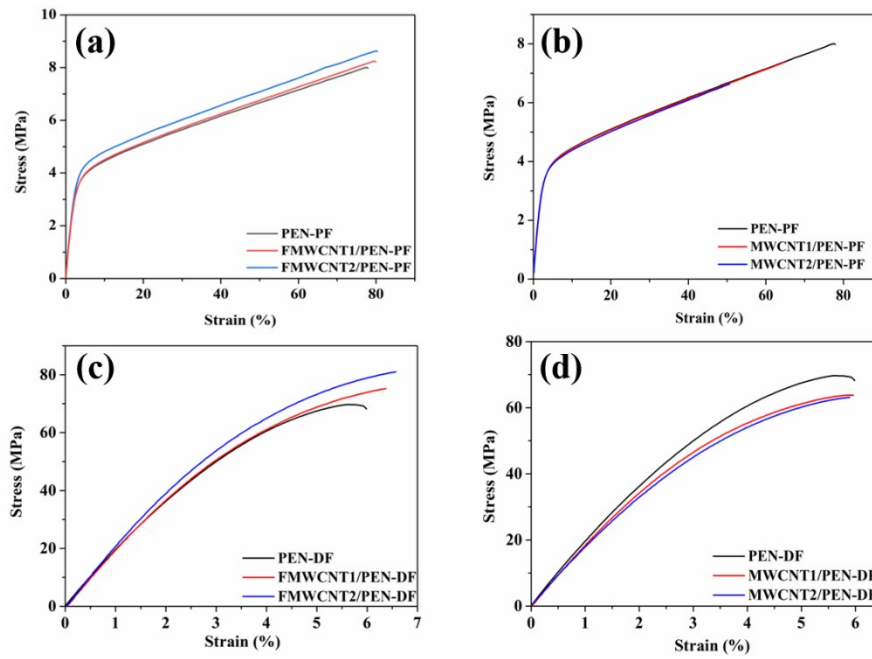

Figure S11 Strain-stress curves of FMWCNT/PEN-PF, MWCNT/PEN-PF, FMWCNT/PEN-DF, MWCNT/PEN-DF composites.
